# Supplementary material for: Phylogenetic and morphological analyses of Coniochaeta isolates recovered from Inner Mongolia and Yunnan revealed three new endolichenic fungal species
Source: PubMed Central journal article supplement (PMC8445908; doi:10.3897/mycokeys.83.71140), 2021-09-09

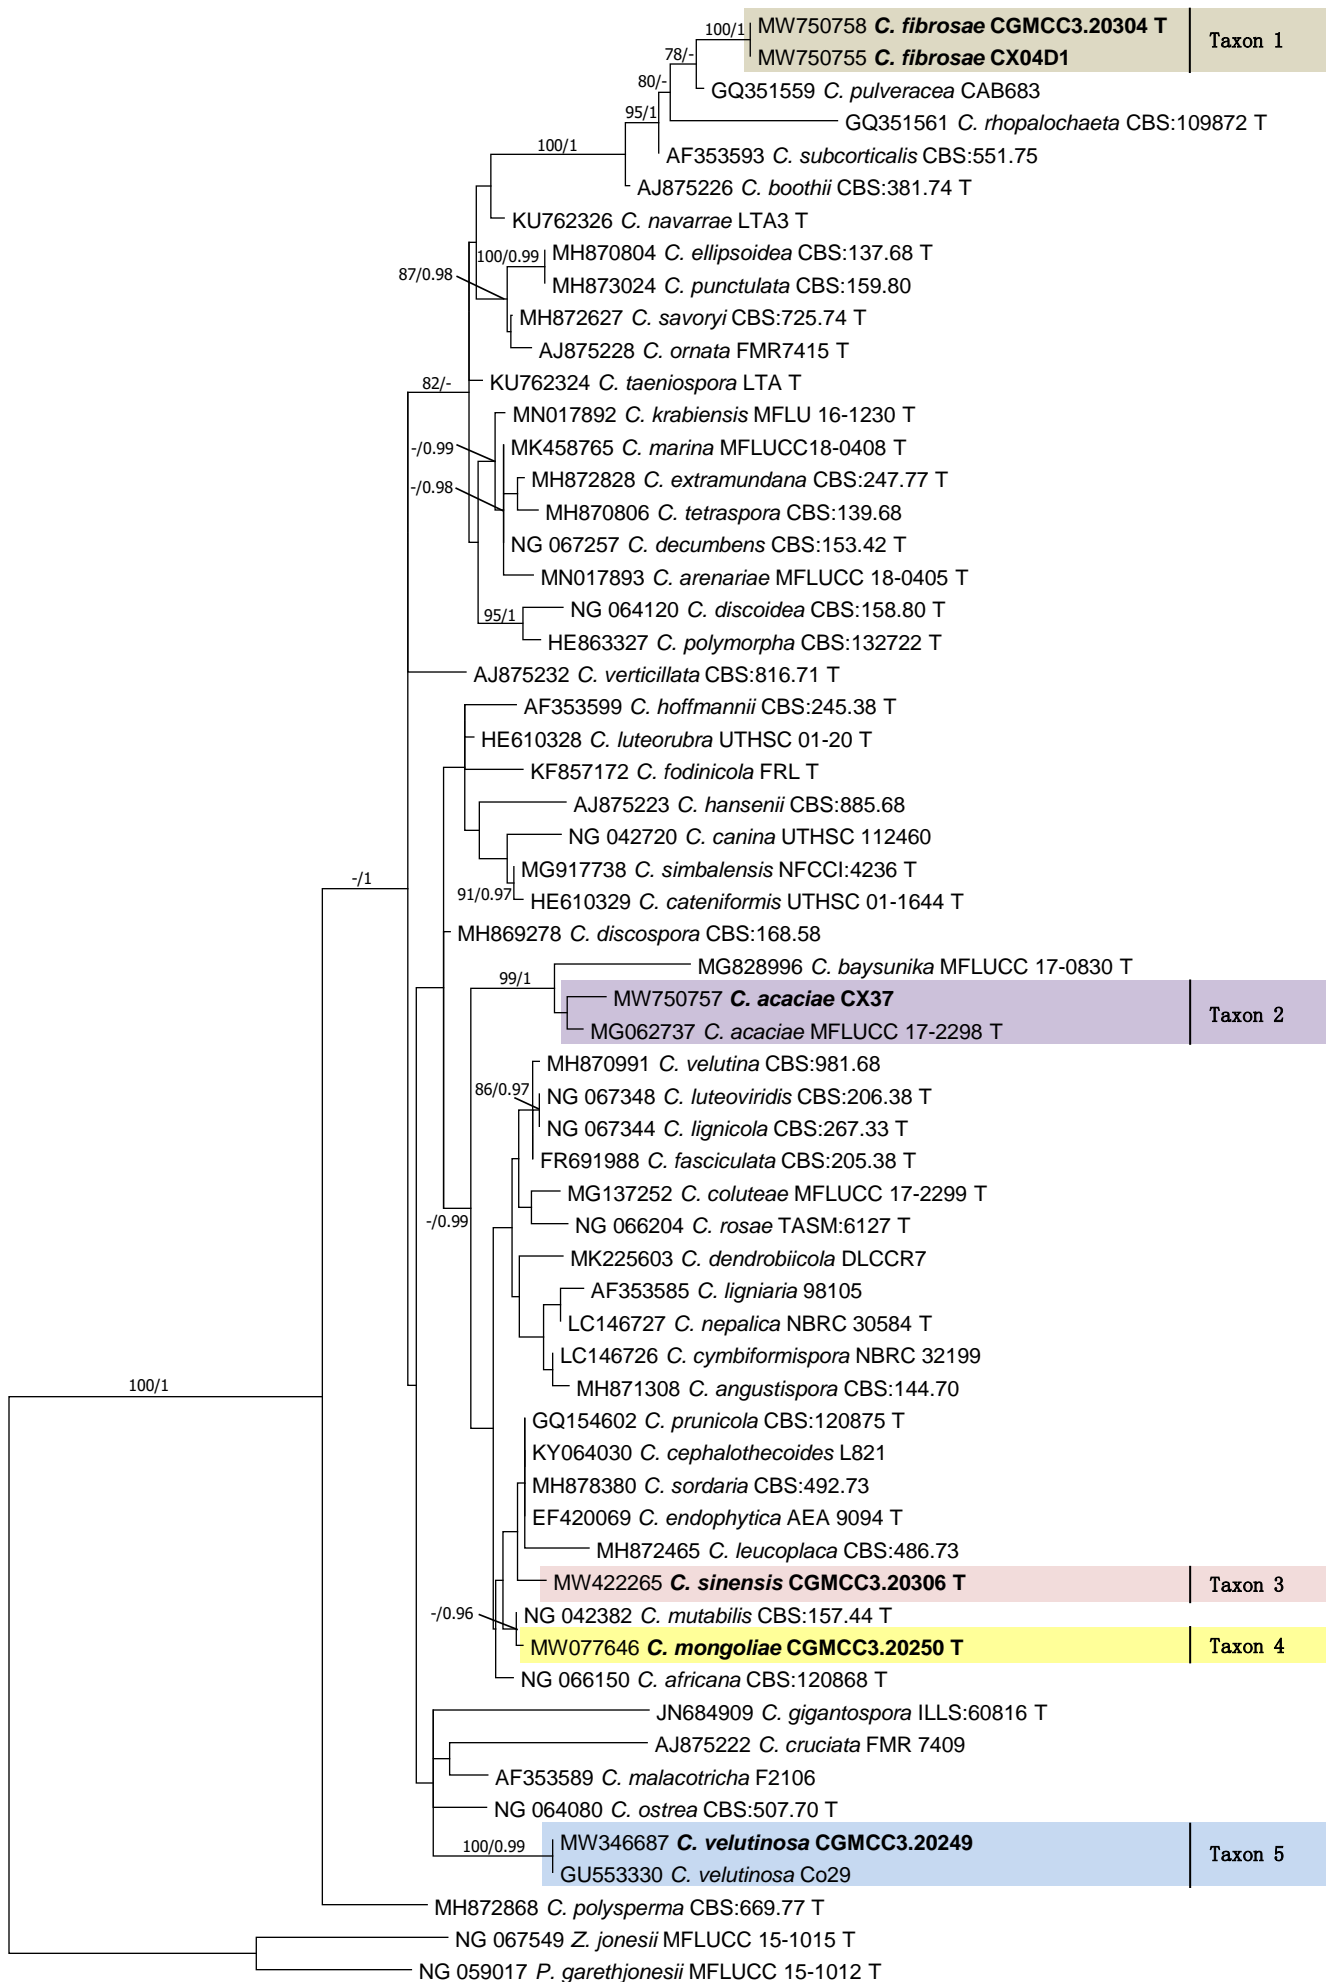

Supplement: mycokeys-83-105-s002.pdf [file mycokeys-83-105-s002.pdf]
